# Supplementary material for: The S/Z Relationship of Rimed Snow Particles
Source: Copernicus journal article supplement (doi:10.5194/amt-2022-317), 2023-01-23
Supplement: Supplementary file [file amt-2022-317-AC2-supplement.pdf]

1 Referee2

2 We appreciate your review and critique of the manuscript. Thank you.

3 The manuscript presents a field experiment in which airborne W-band reflectivity is matched  
4 with ground measurements of snowfall rate to investigate the Z-S relationship for rimed  
5 particles. The topic is very important for the precipitation community because the uncertainties  
6 in the microphysics still lead to very big uncertainties in the precipitation retrievals. The authors  
7 follow up from a series of previous papers, but in particular from the Pokharel and Vali 2011  
8 (PV11) in which a full range of particle types is assumed and the precipitation rate is calculated  
9 from particle density assumptions. In this manuscript the authors focus on a specific particle  
10 type, rimed particles, for which precipitation rate is usually underestimated using “conventional”  
11 Z-S relationships.

12 Despite the great importance of the topic, the manuscript doesn’t really provide a Z-S  
13 relationship for rimed particles as the title would suggest. Most of the manuscript is focused on  
14 the description of the methodology used to calculate the relationship, and very little space is  
15 dedicated to actual results. 4 points are really not enough to derive a Z-S relationship and the  
16 conclusions just state that the measurements of this field campaign fit within PV11 variability.  
17 The fact that rimed particles were not really well represented by published Z-S relationships was  
18 already known so the fact that this manuscript does not present a new Z-S relationship specific  
19 for rimed particles doesn’t match with what the title suggests.

20 The title was revised, and the abstract was revised. Readers of the abstract will see that the  
21 number of S/Z pairs in our analysis is smaller than in PV11.

22 In the revision, we distinguish our work against the studies of PV11. We made direct  
23 measurements of S while PV11 derived S using particle imagery. We think this makes our  
24 contribution significant, despite the smaller number of points.

25 Probably the use of a ground based W-band pointing radar would have helped with the  
26 availability of Z-S points, aided by the aircraft overpass to confirm the presence of riming with  
27 the cloud probes.

28 We agree. At the end of the revised Sect. 5, we state the following:

29 “New research can also refine the S/Z relationship for rimed snow particles. This could  
30 be computational – exploring the utility of parameterizing S in terms of both Z and density – or

31 could be observational. Unlike the investigation of PV11, where only an airborne platform was  
32 employed, we have demonstrated how useful information can be obtained with ground-based and  
33 airborne systems. Another approach would be with collocated ground-based instrumentation, for  
34 density and particle imaging, and for measuring wind, snowfall rate, and radar reflectivity. This  
35 would avoid some of the complications encountered in this study, including W-band attenuation  
36 and a reliance on particle imagery acquired aloft. A close-range measuring radar might also  
37 allow retrievals closer to the surface than in this work. Improvement of methods that remotely  
38 sense supercooled cloud water are also needed.”

39 Given the availability of data (I assume no more aircraft overpasses are available at the site,  
40 otherwise they would have been used),...

41 The two flights analyzed were two of three test flights flown from Laramie in preparation for the  
42 SNOWIE campaign (Tessendorf et al. 2019). The other test flight did not fly over the ground  
43 site.

44 I suggest to stress more the position of the Z-S points in fig. 12, trying to figure out what  
45 differentiates these 4 points from all the other points under the black best fit line or from the  
46 Matrosov 2011 range.

47 Following your critique, and that of Referee3, who brought Hiley et al. (2011) to our attention,  
48 we revised this section. In the revised text, we compare our measurements to Matrosov’s (2007)  
49 calculation, as in the original submission, and we also compare our measurements to Hiley et al.  
50 (2011).

51 Attached here is revised text, from Sect. 3.7, relevant to your criticism:

52

53 “Our S/Z pairs are presented in Table 5 where the indexes ( $i = 0$  and  $i = 1$ ) are used to  
54 indicate results derived for the averaging intervals. Here, the reflectivities are not corrected for  
55 attenuation, however, in Fig. 12, the attenuation-corrected reflectivities are plotted. Uncorrected-  
56 reflectivities from Table 5, attenuations from Table 3, and Eq. 1 were used to calculate the  
57 corrected reflectivities....”

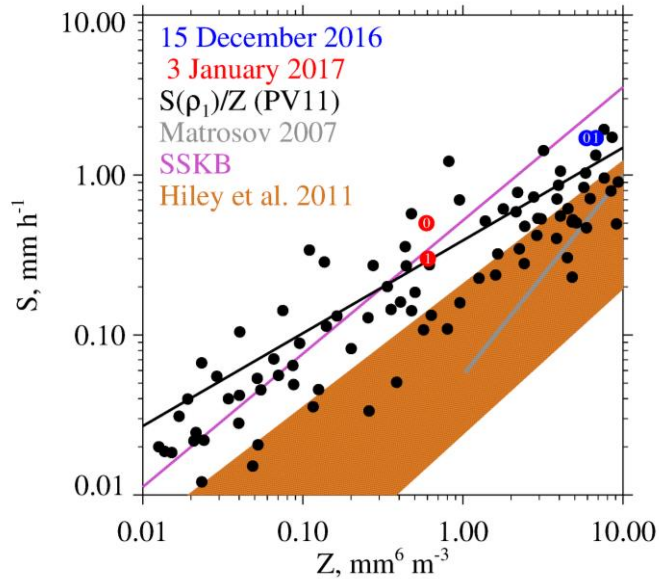

“Figure 12 – Snowfall rate versus radar reflectivity. Colored circles indicate attenuation-  
 corrected reflectivities (Table 3, Table 5, and Eq. 1) for the  $i = 0$  and  $i = 1$  averaging intervals.  
 The  $S(\rho_1)/Z$  points are a subset from PV11’s Fig. 11 ( $0.01 < Z < 10 \text{ mm}^6 \text{ mm}^{-3}$ ). Also plotted is  
 the PV11 best-fit line (black), the  $S/Z$  relationship from Matrosov (2007), the  $S/Z$  relationship  
 abbreviated SSKB (Sect. 1), and the swath of  $S/Z$  relationships, for crystals, from Hiley et al.  
 (2011).”

Here, from the revised Sect. 4, is discussion of Fig. 12. This is also relevant to your criticism.

“We now evaluate departures between our  $S$  measurements and  $S/Z$  calculations from  
 Hiley et al. (2011). Each of the departures will be evaluated as the vertical distance between the  
 top of the orange region in Fig. 12 and our  $S/Z$  data points. Reflectivities at the top of the orange  
 region were calculated using attenuation-corrected reflectivities (Eq. 1) and the upper-limit  $S/Z$   
 equation from Hiley et al. (2011) ( $S = 0.21 \cdot (Z')^{0.77}$ ; Sect. 1 and Eq. 1). In terms of a relative  
 difference, expressed as  $(S_{HP} - S)/S$  and with  $S_{HP}$  an attenuation-corrected snowfall rate, the

84 departures are no smaller than 0.9 and 1.1 on 15 December and 3 January, respectively. These  
85 minimum relative differences exceed the hotplate precision (Sect. 2.4) by approximately a factor  
86 of three. We therefore conclude that our paired values of surface-measured precipitation and  
87 aircraft-measured radar reflectivity, after correcting for attenuation, provide evidence that a  
88 calculation of S based the Hiley et al. (2011) upper-limit, when applied to rimed snow particles,  
89 is associated with a low-biased estimate of S.”

90 On the other hand, I understand that this journal is about atmospheric measurement techniques,  
91 so if the goal is to describe the methodology to match aircraft with ground based observations,  
92 that is not really clear from the title and the abstract. As I said earlier, my expectation here is to  
93 find a new Z-S relationship for rimed particles. Based on what you decide the goal of the  
94 manuscript is, please revise accordingly.

95

96 In addition to modifying the title and abstract, we addressed this by adding goals to the revised  
97 Sect. 1.

98 “The goals of this paper are as follows: 1) to describe measurements of undercatch-  
99 corrected liquid-equivalent snowfall rate ( $S$ ,  $\text{mm h}^{-1}$ ) that were paired with W-band  
100 measurements of reflectivity ( $Z$ ,  $\text{mm}^6 \text{m}^{-3}$ ); 2) to contrast the measurement-based  $S/Z$  pairs  
101 against calculated  $S/Z$  relationships commonly applied in retrievals of  $S$  based on reflectivity;  
102 and 3) to investigate why the acquired data set deviates from predictions of some calculated  $S/Z$   
103 relationships.”

104 Also as a general comment, there are too many not needed figures in this manuscript, I provided  
105 some suggestions to consolidate them.

106 Figures 7a and 8a are removed from the revised manuscript.

107 Specific comments:

108 Section 2.1 and in general when you mention AF environmental data. It is not clear to me when  
109 you actually use this dataset in your analysis since HP already has the data needed to calculate

110 precipitation rate. Probably I missed it, but I would suggest to be more clear so it could be more  
111 obvious.

112 This is clarified in the revision. The AF data was used to derive the following: Absolute  
113 humidity (Sect. 3.2), cloud base altitude (Sect. 3.2), horizontal wind advection speed (Sect. 3.5),  
114 and adiabatic cloud liquid water path (Sect. 3.7). We used AF measurements for these properties  
115 because the hotplate T measurement is known to be high biased during daytime (Marlow et al.  
116 2023). Marlow et al. (2023) was reviewed at AMS/JAMC; we submitted revisions back to the  
117 journal two months ago.

118 But on the other side, how far are the two sites? we know environmental conditions change a lot,  
119 especially in mountain environment, could the conditions be very different in this case?

120 AF and HP were separated horizontally by 2000 m and vertically by 190 m. SN and HP were  
121 separated horizontally by 1200 m and vertically by 110 m. Site altitudes are in Fig. 1a.

122 Is it actually reliable to use that data as it was at HP? And the same is for the SNOTEL site,  
123 would it actually reflect the HP situation?

124 The AF thermodynamic measurements (T/RH/P) were acquired on a tower at a long-term  
125 climate monitoring site (AmeriFlux). The exact altitude of that measurement is in the footnotes  
126 of Table 2. Relevant to your question, here is what we know about the ground sites: 1) The  
127 vertical separation of AF and HP, and 2) that the winter-season wind flow is nearly always  
128 directed approximately from AF to HP. From those characteristics, and the dry adiabatic  
129 temperature lapse rate, we expect the temperature difference AF - HP to be no smaller than -2 K.  
130 If you look at the sequences from HP and AF (Data Availability Statement;  
131 <https://doi.org/10.15786/20247870>), you will see that the AF - HP temperature difference, at  
132 night (see above discussion of the HP's daytime temperature measurement bias), conforms to our  
133 expectation. Hence, we think it is reasonable to assume the AF thermodynamic measurements  
134 are representative of the region surrounding the three ground sites (AF/SN/HP). This region is  
135 shown in Figs. 3a-b.

136 The consistency of the SN and HP snowfall measurements is discussed in Sect. 2.4 (revised  
137 manuscript) and in Marlow et al. (2023).

138

139 Regarding the AF-derived horizontal wind velocity, we do not have a check on how  
140 representative that is for the AF/SN/HP region. We do know that the measurement was made

141 above the tree tops (the anemometer was/is deployed at the top of a tower) and that the  
142 measurement system (propeller anemometer) is reliable.

143 Section 2.4, you describe the hotplate and all the bias corrections needed, included a comparison  
144 with a fenced precipitation gauge. Why isn't the HP inside a fence?

145 We apply an algorithm which assumes the hotplate is not within a fence. This is discussed in  
146 Sect. 2.4 of the revised manuscript.

147 Section 3.3, lines 287-291: why mentioning this previous attempt to compare wind speeds if data  
148 sets are difficult to interpret and they do not provide useful results for this work?

149 Because we reported, in a conference presentation, comparisons of hotplate-derived and Vaisala-  
150 derived wind speeds. We later found the problem with the Vaisala-derived speeds.

151 What is the point to show up- and down-looking reflectivities? Up-ward ones are not needed for  
152 this work...

153 There are three reasons for this. 1) In Sect. 3.6 we discuss the fall streaks at  $\sim z = 5500$  m in Fig.  
154 5a (i.e., above the flight level in the up-looking height-time cross-section). 2) People would ask for  
155 what's above the flight level if we did not show that information. 3) To compare, on one page,  
156 the two weather systems (i.e., one has relatively large reflectivities, is deeper and stratiform, the  
157 other has smaller reflectivities, and is shallow and convective).

158 ...actually these plots are a repetition of figures 9 and 10 (except for the up-ward reflectivities).

159 Vertical winds can be consolidated into figs 9 and 10 too, focusing on the portion of the overpass  
160 that is actually of interest for the analysis.

161 We think we have crafted things effectively and logically. Please consider the revised  
162 manuscript. Here is how the presentation evolves from Figs. 5a-d, to particle imagery (Sect. 3.6),  
163 to Sect. 3.7 (S/Z Relationships), and to Fig. 12:

164 What is shown in Figures 5a-d (Sect. 3.5) ends at the overflight time. Figures 6a-d explain the  
165 averaging. Figures 7 and 8 show the ground measurements and ground-measurement averaging  
166 intervals. Nearly at the end of Sect. 3.5, we introduce Figures 9a-b and 10a-b. These show the  
167 WCR measurements prior to and after aircraft's overflight. We also state why the time axes are  
168 different in Figures 9a-b and 10a-b (compared to Figs. 5a-d), and that the WCR "structures" in  
169 Figs. 9a-b and 10a-b will be discussed in the following section (i.e., Sect. 3.6, Snow Particle  
170 Imagery). Section 3.5 ends with Table 5. The Table 5 has the averages. The averages are the  
171 basis for Fig. 12, Sect. 3.7 (S/Z Relationships), and Sect. 4 (Results).

172 Line 433-434, the meaning of the slopes is not really clear if the reader hasn't read the appendix  
173 yet. I would suggest to add a sentence explaining why the HP line is flat while the WCR one has  
174 a slope (and then refer to appendix for details).

175 We revised this portion of the manuscript and revised Fig. 6. Here is the revised text:

176 “The HP measurements were averaged over two adjacent 60 s intervals. The first extends  
177 from  $t_o$  to  $t_o + 60$  s (Fig. 6a) and the second from  $t_o + 60$  s to  $t_o + 120$  s (Fig. 6c). In Fig. 6a  
178 and in Fig. 6c,  $t_{HP,B}$  symbolizes an interval's beginning time and  $t_{HP,E}$  symbolizes an interval's  
179 ending time. Formulas describing how these times were related to the beginning and ending  
180 times of the corresponding WCR averaging intervals are in the Appendix. Fig. 6b is a schematic  
181 of the first WCR averaging interval and Fig. 6d is a schematic of the second. Again, the  
182 subscripts “B” and “E” are used to indicate averaging beginning and ending times. Figures 6b  
183 and 6d both have lines at the tops of an averaging interval/domain. The slopes of these lines are  
184 proportional to the ratio of two speeds. These speeds are a maximum likely snow particle speed  
185 toward the ground ( $v_p$ ) and a horizontal wind advection speed ( $v_w$ ). The  $v_p$  was calculated using  
186 averaged vertical-component Doppler velocities and  $v_w$  was calculated using a vertical profile of  
187 horizontal winds, based on WKA horizontal wind measurements and AF horizontal wind  
188 measurements (Figs. A1a-b), and using the WKA track vector (Table 2). An altitude ( $z' = 3400$   
189 m) was assumed in the calculation of  $v_w$ . This is the altitude of the ridges west and northwest of  
190 the HP site (Figs. 3a-b). Picking the altitude to be either  $z' = 3200$  m or  $z' = 3600$  m does not  
191 alter our findings.”

192 Figure 6: I am not sure this figure is needed or can probably be moved to the appendix. I find it a  
193 bit confusing.

194 We revised Fig. 6.

195 Figure 7b is the same as fig. 2, just extended to reflect the situation around the observation time.  
196 I would try to consolidate the figures.

197 **Figures 7a and 8a (both had wind speed at the hotplate) were eliminated from the revision.**

198 As I mentioned before, despite the presence of fig. 6, the averaging intervals are not clear and  
199 confusing. The appendix should be for details, not for the general understanding of what we are  
200 looking at. For example the difference between  $i=0$  point being after  $t_0$  for HP and before for  
201 WCR should be stated somewhere in the text (not only in the appendix). Or the meaning of the  
202 WCR slope.

203 **Figure 6 was revised.**

204 Minor comments:

205 In the abstract you refer to ‘published Z-S relationship’ which sound like a very specific one (I  
206 assume you are referring to PV11). It is probably good to mention it.

207 **Yes, in the revised abstract we did that.**

208 line 309: add ‘forced through the origin, RED LINE’.

209 **Yes, in the revised manuscript we did that.**

210 Line 366: provide a time reference for the ridgeline as you did for the last 3 seconds.

211 **Yes, in the revised manuscript we did that.**

212 Figure 5, the plot at the end goes outside the axes (red line).

213 **Yes, in the revised manuscript we fixed that.**

214 Figures 7a and 8a are never mentioned in the text, either mention them or remove.

215 **Yes, in the revised manuscript those two panels are removed.**

216 Figures 9b and 10b, usually doppler velocity has a blue/red colormap, you might consider it for  
217 consistency with other publications or just for differentiating it from the reflectivity plot on figs  
218 9a and 10a.

219 **Yes. This was done in the Doppler velocity panels of Figs. 9 and 10.**

220 Line 629: ‘within the variability’ – maybe in fig. 12 you can plot the PV11 variability to make it  
221 more clear.

222 **We did not do that, but Fig. 12 was substantially modified in the revision.**

223 Line 693: in Kulie et al the threshold is 0 dBZ.

224 **That sentence was removed from the revision.**
