# Supplementary material for: The S/Z Relationship of Rimed Snow Particles
Source: Copernicus journal article supplement (doi:10.5194/amt-2022-317), 2023-01-23
Supplement: Supplementary file [file amt-2022-317-AC3-supplement.pdf]

1 Referee3

2 We appreciate your review and critique of the manuscript. Thank you.

3 This manuscript advertises observational evidence from combined ground-based snowfall rate  
4 (S) and airborne W-band radar reflectivity (Z) measurements that rimed frozen hydrometeors are  
5 associated with somewhat unique Z-S relationships. These types of studies are desperately need  
6 to more accurately characterize the sensitivity of W-band reflectivity to different particle  
7 microphysical characteristics, so I laud the authors on their attempts to constrain Z-S  
8 relationships for rimed situations using observational assets. My main concern is the lack of  
9 data points presented in this analysis - are the results meaningful since the sample size is so  
10 small? I am not sure how to suggest solving this issue other than collecting and analysing more  
11 data. Conversely, I am very cognizant of how difficult it is to match spatiotemporally disparate  
12 datasets like airborne radar to point source measurements of precipitation rates at the ground, so I  
13 can appreciate how this study might still be valuable to the community by demonstrating the  
14 "atmospheric measurement technique" used so it can be replicated and improved in the future.  
15 The manuscript could probably be improved greatly if the narrative leaned more heavily into this  
16 aspect of the study. Addressing this issue might be as simple as more forcefully advertising how  
17 difficult it is to make such measurements combined with how important it is to collect  
18 observational Z-S evidence under rimed conditions in both the introduction and conclusions. I  
19 might be able to offer more impactful suggestions in the future when I digest the manuscript  
20 again, but I encourage the authors to think about how to creatively make the narrative more  
21 impactful.

22 The revision has improved explanations of the approach we took (Sect. 1); we also improved on  
23 descriptions of our method for acquiring S/Z measurements (Sect. 3.5). Discussion of how our  
24 S/Z pairs compare to computed S/Z relationships is also revised (Sect. 4 and Sect. 5). In the  
25 revised Sect. 5, we added discussion of possible paths for future studies of S/Z relationships. In  
26 sum, we think the revised manuscript is improved in terms of how we describe what we did, how  
27 we describe our findings, and in terms of our descriptions of future research needed to better  
28 refine S/Z relationships for rimed snow particles.

29 Specific comments:

30 Introduction: I think it's important to note sooner in the introduction that some of the initial S/Z  
31 studies performed for W-band radars were purely modeling (i.e., using backscatter calculations

32 from idealised models of frozen ice habits combined with parametrised particle size  
33 distributions) studies. This is a very simple way to accentuate the methodological differences  
34 (and importance) of observationally-based studies to assess the veracity of idealised modeling  
35 studies.

36 We added a paragraph to the revised Sect. 1. This encapsulates the connections between our  
37 observational approach and the computational work of others.

38 “The goals of this paper are as follows: 1) to describe measurements of undercatch-  
39 corrected liquid-equivalent snowfall rate ( $S$ ,  $\text{mm h}^{-1}$ ) and how those were paired with W-band  
40 measurements of reflectivity ( $Z$ ,  $\text{mm}^6 \text{m}^{-3}$ ); 2) to contrast the measurement-based  $S/Z$  pairs  
41 against calculated  $S/Z$  relationships commonly applied in retrievals of  $S$  based on reflectivity;  
42 and 3) to investigate why the acquired data set deviates from predictions of some calculated  $S/Z$   
43 relationships.”

44 Two further studies of interest (and there are likely more) are Hiley et al. (2011) and Kneifel et  
45 al. (2015). Both highlight W-band radar applications for snowfall estimation and also provide  
46 analyses that either hint at or explicitly demonstrate how the existence of supercooled water and  
47 associated riming complicate  $Z$ - $S$  relationships.

48 When writing the original submission, we were not aware Hiley et al. (2011). The latter is now  
49 one of the computational studies we compare to in the revision. Kneifel et al. (2015) is also  
50 included in the revision.

51 Battaglia and Delanoe (2013) and Battaglia and Panegrossi (2020) also demonstrate the global  
52 occurrence of snowfall events with supercooled liquid water and  $Z$ - $S$  implications. These  
53 studies might provide additional context to frame this study’s importance, including W-band  
54 attenuation.

55 The second of these is referenced (revised Sect. 5) because it synergizes lidar, radiometer, and  
56 active W-band remote sensing with a views toward retrieving the spatial distribution of

57 supercooled liquid and diagnosing where riming is occurring. Also, the paper's discussion of  
58 attenuation helped us in formulating our assessment of attenuation.

59 I am not very familiar with the hotplate and its history of accurate snowfall rate measurements.  
60 While the authors provide some background on previous studies that have been published using  
61 hotplates, mostly related to various hotplate precipitation estimates due to various issues (e.g.,  
62 catch efficiencies, wind speed measurement height, etc.), I still do not see any evidence that this  
63 instrument is effective at accurately measuring snowfall rates under various environmental  
64 conditions. I would greatly appreciate at least a few more sentences that describe hotplate  
65 performance based on previous studies, including uncertainty estimates. No snowfall rate  
66 measurement device is perfect, but it would be nice to see more details regarding the hotplate since  
67 this instrument is such an important component of this study.

68 The revised Sect. 2.4 includes a description of the measurement precision. This was based on a  
69 comparison between the hotplate and the SNOTEL pillow systems (Marlow et al. 2023). The  
70 gauge comparison has 57 paired measurements from the HP (hotplate) and SN (SNOTEL pillow)  
71 gauges operated at the HP and SN locations in Figs. 1a-b. In the revised Sect. 4, we apply the S  
72 precision in a discussion of the departure between our measurements and the computational S/Z  
73 relationships. Marlow et al. (2023) was reviewed at AMS/JAMC; we submitted revisions back to  
74 the journal two months ago.

75 Somewhat related to the last point, can the authors further quantify (or at least qualitatively  
76 describe) the uncertainties related to their spatiotemporal averaging methodology for both  
77 airborne radar and ground-based snowfall rate measurements? What is the sensitivity of the  
78 results for slight changes in averaging methodology?

79 There is discussion of this in the revised manuscript. The following is from Sect. 3.5.

80 "The HP measurements were averaged over two adjacent 60 s intervals. The first extends  
81 from  $t_o$  to  $t_o + 60$  s (Fig. 6a) and the second from  $t_o + 60$  s to  $t_o + 120$  s (Fig. 6c). In Fig. 6a  
82 and in Fig. 6c,  $t_{HP,B}$  symbolizes an interval's beginning time and  $t_{HP,E}$  symbolizes an interval's  
83 ending time. Formulas describing how these times were related to the beginning and ending time  
84 of a corresponding WCR averaging interval are in the Appendix. Fig. 6b is a schematic of the  
85 first WCR averaging interval and Fig. 6d is a schematic of the second. Again, the subscripts "B"

86 and “E” are used to indicate averaging beginning and ending times. Figures 6b and 6d both have  
87 lines at the top of an averaging interval/domain. The slopes of these lines are proportional to the  
88 ratio of two speeds. These speeds are a maximum likely snow particle speed toward the ground ( $v_p$ )  
89 and a horizontal wind advection speed ( $v_w$ ). The  $v_p$  was calculated using averaged vertical-  
90 component Doppler velocities and  $v_w$  was calculated using a vertical profile of horizontal winds,  
91 based on WKA horizontal wind measurements and AF horizontal wind measurements (Figs.  
92 A1a-b), and using the WKA track vector (Table 2). An altitude ( $z' = 3400$  m) was assumed in  
93 the calculation of  $v_w$ . This is the altitude of the ridges west and northwest of the HP site (Figs.  
94 3a-b). Picking the altitude to be either  $z' = 3200$  m or  $z' = 3600$  m does not alter our findings.”

95 The radar blind zone, and what happens within that layer, is incredibly important. The 200 m  
96 WCR blind zone is mentioned in this study in a few locations, but I think the authors need to  
97 mention more prominently that a tacit assumption used in this study (similar to a host of other  
98 airborne or spaceborne radar studies) is that microphysical evolution within the blind zone could  
99 be a major source of uncertainty. I do not recall any studies that conclusively document how  
100 rimed particle density evolves in the lowest few hundred meters of the atmosphere – presumably  
101 not much – but this is an important to note within this manuscript. It at least warrants a topic  
102 that should be studied in the future in the conclusion or discussion sections. It would have been  
103 nice to have additional microphysical measurements at the surface to assess the microphysical  
104 evolution, but I completely understand how difficult it is to procure instrument suites for  
105 fieldwork.

106 We agree. There is the 200 m deep radar blind zone that encompasses the flight track and the  
107 blind zone immediately above the terrain. The latter is a consequence of ground clutter, and in  
108 our opinion, is more important for our analysis. Given this, we wrote this in the revised Sect. 5:  
109 “New research can also refine the S/Z relationship for rimed snow particles. This could  
110 be computational – exploring the utility of parameterizing S in terms of both Z and density – or  
111 could be observational. Unlike the investigation of PV11, where only an airborne platform was

112 employed, we have demonstrated how useful information can be obtained with ground-based and  
113 airborne systems. Another approach would be with collocated ground-based instrumentation, for  
114 density and particle imaging, and for measuring wind, snowfall rate, and radar reflectivity. This  
115 would avoid some of the complications encountered in this study, including W-band attenuation  
116 and a reliance on particle imagery acquired aloft. A close-range measuring radar might also  
117 allow retrievals closer to the surface than in this work. Improvement of methods that remotely  
118 sense supercooled cloud water are also needed.”

119 I will likely add further comments later in the review cycle. But I would like to see the above  
120 comments addressed by the authors before I devote more time to more specific comments.

121

122 I think this manuscript has potential and could be publishable. But I encourage the authors to  
123 fine tune it further to make it more impactful.
